# Supplementary material for: Genetic Variants from Lipid-Related Pathways and Risk for Incident Myocardial Infarction
Source: PLOS journal article supplement (doi:10.1371/journal.pone.0060454), 2013-03-29
Supplement: S1 (10.1371/journal.pone.0060454.s001) [file journal.pone.0060454.s001]

**Supplementary Table 1.** Candidate genes and SNPs included in the present study

| Gene                       | SNP                                                                                                                                                                                                                                                                                                |
|----------------------------|----------------------------------------------------------------------------------------------------------------------------------------------------------------------------------------------------------------------------------------------------------------------------------------------------|
| <b><i>PLA2G2A</i></b>      | rs2795480, rs13375942, rs6672057, rs4655020, rs1891320, rs12732308, rs10916683, rs11677,<br>rs955587, rs2307246, rs2236771, rs11573142, rs10916685, rs12029284, rs7530853, rs1395470                                                                                                               |
| <b><i>PCSK9</i></b>        | rs11588151, rs2495498, rs2479417, rs17192725, rs2495488, rs17111495, rs2149041, rs2479409,<br>rs4927193, rs529787, rs11206514, rs572512, rs585131, rs483462, rs615563, rs662145, rs13312,<br>rs17410294, rs10493176                                                                                |
| <b><i>CELSR2/SORT1</i></b> | rs4970834, rs611917, rs646776, rs602633, rs413582, rs464218, rs17585355, rs2303873, rs11142,<br>rs11581665, rs12037569                                                                                                                                                                             |
| <b><i>GALNT2</i></b>       | rs6541294, rs4846908, rs1998064, rs10127775, rs4846918, rs609526, rs1124110, rs678050,<br>rs611229, rs612577, rs4846928, rs4846930, rs4846935, rs11122469, rs3811488, rs3811486,<br>rs2273966, rs656029, rs632557, rs16851269, rs3811485, rs7518564, rs2279432, rs4846849,<br>rs1471915, rs9432145 |
| <b><i>APOB</i></b>         | rs1042034, rs1042031, rs1800479, rs1801701, rs693, rs1041968, rs11126598, rs11676704, rs679899,<br>rs570877, rs1469513, rs1367117, rs588245, rs585967, rs17398765, rs11892073, rs934198, rs562338,                                                                                                 |

|                       |                                                                                                                                                                                                                |
|-----------------------|----------------------------------------------------------------------------------------------------------------------------------------------------------------------------------------------------------------|
|                       | rs754523                                                                                                                                                                                                       |
| <b><i>GTF3C2</i></b>  | rs1049817, rs11689803                                                                                                                                                                                          |
| <b><i>GCKR</i></b>    | rs11675428, rs1260345, rs813592, rs8179219, rs1260326, rs3817588, rs780094, rs1919127                                                                                                                          |
| <b><i>XAB1</i></b>    | rs4666009, rs2141371, rs10201652                                                                                                                                                                               |
| <b><i>IGF2BP2</i></b> | rs11705729, rs4402960                                                                                                                                                                                          |
| <b><i>HMGCR</i></b>   | rs10474433, rs3895886, rs3843480, rs3761739, rs17244953, rs2241402, rs11742194, rs12654264,<br>rs3846662, rs4629571                                                                                            |
| <b><i>AGER</i></b>    | rs2269423, rs9469089, rs3134943, rs1035798, rs1800684, rs1800625, rs204995, rs204993, rs3132940                                                                                                                |
| <b><i>PLA2G7</i></b>  | rs974670, rs12528857, rs1051931, rs2216465, rs4498351, rs1421372, rs17288905, rs16874962,<br>rs1805017, rs3799861, rs9472830, rs12528807, rs1421368, rs1421378, rs1421379, rs1862008,<br>rs12211537, rs9296510 |
| <b><i>ACAT2</i></b>   | rs1475123, rs927450, rs25683, rs3465, rs15982, rs4832, rs2295898                                                                                                                                               |
| <b><i>TBL2</i></b>    | rs17145738, rs35607697, rs2286276                                                                                                                                                                              |
| <b><i>MLXIPL</i></b>  | rs11772762, rs6967107, rs3812316, rs7798357, rs17145813, rs13230514, rs799166, rs7777102                                                                                                                       |
| <b><i>CHRM2</i></b>   | rs2350780, rs2061174, rs7799047, rs2350786, rs6948054, rs324650, rs8191992, rs1378650,<br>rs1424548                                                                                                            |

|                              |                                                                                                                                                                                                                                                                                                                                                                                                                                                                                                                                         |
|------------------------------|-----------------------------------------------------------------------------------------------------------------------------------------------------------------------------------------------------------------------------------------------------------------------------------------------------------------------------------------------------------------------------------------------------------------------------------------------------------------------------------------------------------------------------------------|
| <b><i>LPL</i></b>            | rs17410577, rs1534649, rs3779788, rs248, rs249, rs253, rs255, rs256, rs263, rs270, rs281, rs283, rs285, rs301, rs316, rs320, rs328, rs10099160, rs11570891, rs1059507, rs2197089, rs10105606, rs2410617, rs10503669                                                                                                                                                                                                                                                                                                                     |
| <b><i>CDKN2A/B</i></b>       | rs2383208, rs10811661                                                                                                                                                                                                                                                                                                                                                                                                                                                                                                                   |
| <b><i>ABCA1</i></b>          | rs2515606, rs363717, rs4149338, rs2482433, rs2740485, rs2066881, rs4149336, rs2297406, rs2020927, rs2230808, rs2297404, rs2777801, rs2066716, rs2297409, rs4149313, rs2066717, rs2065412, rs2515601, rs2472386, rs2274873, rs4149291, rs1175293, rs2230806, rs2230805, rs4149271, rs11789603, rs4149268, rs3890182, rs10120087, rs2740487, rs2777793, rs3905001, rs2575879, rs10820743, rs4149264, rs4149262, rs12350560, rs2515618, rs2437811, rs10991414, rs2472377, rs1800977, rs2246293, rs2043664, rs2487042, rs2472496, rs3887137 |
| <b><i>ABCA2</i></b>          | rs6560653                                                                                                                                                                                                                                                                                                                                                                                                                                                                                                                               |
| <b><i>IDE/HHEX</i></b>       | rs2149632, rs7084090, rs1111875, rs5015480, rs7087591, rs7923837                                                                                                                                                                                                                                                                                                                                                                                                                                                                        |
| <b><i>SAA4/SAA2/SAA1</i></b> | rs7940510, rs2445227, rs2445176, rs11024578, rs1520887, rs1520886, rs12282742, rs7113375, rs7130337, rs3825023, rs7108343, rs10832911, rs1993373, rs11603089, rs4638289, rs1829575, rs11024600                                                                                                                                                                                                                                                                                                                                          |
| <b><i>BDNF</i></b>           | rs7124442, rs6265, rs11030104, rs2049045, rs7103411, rs7104207, rs1013402, rs7127507,                                                                                                                                                                                                                                                                                                                                                                                                                                                   |

|                                       |                                                                                                                                                                                                                                                                                                              |
|---------------------------------------|--------------------------------------------------------------------------------------------------------------------------------------------------------------------------------------------------------------------------------------------------------------------------------------------------------------|
|                                       | rs2030324, rs12273363, rs908867                                                                                                                                                                                                                                                                              |
| <b><i>NR1H3</i></b>                   | rs4752973, rs7118396, rs10838681, rs11039149, rs3758674, rs12221497, rs2279238, rs7114704,<br>rs10501320, rs10501321, rs2291119                                                                                                                                                                              |
| <b><i>ACAT1</i></b>                   | rs15677, rs12577790, rs7114794, rs7931681, rs10890817, rs11607588, rs35188041, rs3741049,<br>rs10890818, rs11212524, rs10890819, rs2280332, rs4754298                                                                                                                                                        |
| <b><i>APOA5/APOA4/APOC3/APOA1</i></b> | rs28927680, rs12286037, rs619054, rs2072560, rs3135506, rs662799, rs1729409, rs1263167,<br>rs1263173, rs5110, rs5104, rs5092, rs5090, rs2854117, rs4520, rs689243, rs888245, rs625145                                                                                                                        |
| <b><i>SORL1</i></b>                   | rs668387, rs689021, rs641120, rs2070045, rs3824968, rs2282649                                                                                                                                                                                                                                                |
| <b><i>LRP1</i></b>                    | rs324013, rs11172106, rs12298170, rs715948, rs4759277, rs1799986, rs7398375, rs10876966,<br>rs1800194, rs12814239, rs1800139, rs1800154, rs1800156, rs1800168, rs1140648, rs1800159,<br>rs7956957                                                                                                            |
| <b><i>SCARB1</i></b>                  | rs838879, rs838883, rs701106, rs838887, rs838895, rs838896, rs5888, rs989892, rs865716, rs838900,<br>rs4765615, rs745529, rs1902569, rs11608336, rs12581963, rs10773107, rs10744182, rs4765622,<br>rs10773109, rs12370382, rs3924313, rs10773111, rs11615630, rs4379922, rs10846760, rs6488950,<br>rs7295752 |
| <b><i>CYP46A1</i></b>                 | rs2895812, rs4145039, rs943884, rs10137574, rs943880, rs2146238, rs2273839, rs12434024,                                                                                                                                                                                                                      |

|                      |                                                                                                                                                                                                                                                                                                                                                                                                                                      |
|----------------------|--------------------------------------------------------------------------------------------------------------------------------------------------------------------------------------------------------------------------------------------------------------------------------------------------------------------------------------------------------------------------------------------------------------------------------------|
|                      | rs3752958, rs7157032, rs1957514, rs8018381, rs2281682                                                                                                                                                                                                                                                                                                                                                                                |
| <b><i>LIPC</i></b>   | rs4775041, rs4774297, rs1800588, rs6494005, rs11632618, rs8034802, rs166362, rs261337,<br>rs634746, rs488490, rs3825776, rs10518976, rs934297, rs12909642, rs7182229, rs877480,<br>rs17190587, rs1869137, rs1973028, rs1869144, rs4613005, rs4775067, rs12904012, rs11853726,<br>rs2233741, rs2242062, rs690, rs16940472, rs6083, rs2242065, rs7165654, rs7166788, rs871804,<br>rs7178362, rs17190678, rs3751542, rs17269397, rs6074 |
| <b><i>SELS</i></b>   | rs4965811, rs12910524, rs9806366, rs2101171, rs9874, rs4965373, rs4965814, rs10152335,<br>rs4965820                                                                                                                                                                                                                                                                                                                                  |
| <b><i>CETP</i></b>   | rs247611, rs9989419, rs6499863, rs12708967, rs3764261, rs12447924, rs17231506, rs1800775,<br>rs1864163, rs9929488, rs7203984, rs7205804, rs1532625, rs12708974, rs9930761, rs5883, rs289717,<br>rs12720898, rs5880, rs1800774, rs5882, rs1801706, rs289742, rs289745, rs17369163, rs12934552                                                                                                                                         |
| <b><i>LCAT</i></b>   | rs17240392, rs1109166, rs2292318                                                                                                                                                                                                                                                                                                                                                                                                     |
| <b><i>SREBF1</i></b> | rs11653007, rs9899634, rs3183702                                                                                                                                                                                                                                                                                                                                                                                                     |
| <b><i>LIPG</i></b>   | rs12962061, rs2000812, rs2000813, rs2097055, rs8093249, rs2276269, rs9951026, rs11664186,<br>rs12604221, rs12606544, rs4939585, rs16950701, rs2156552                                                                                                                                                                                                                                                                                |
| <b><i>LDLR</i></b>   | rs6511720, rs8110695, rs2228671, rs2569559, rs1003723, rs5930, rs1569372, rs4508523, rs2738446,                                                                                                                                                                                                                                                                                                                                      |

|                      |                                                                                                                                                                         |
|----------------------|-------------------------------------------------------------------------------------------------------------------------------------------------------------------------|
|                      | rs2738447, rs1799898, rs5925, rs5927, rs2569540, rs12459476, rs2738460, rs2738464                                                                                       |
| <b><i>APOE</i></b>   | rs429358, rs7412                                                                                                                                                        |
| <b><i>NR1H2</i></b>  | rs11666394, rs17373080, rs4802703                                                                                                                                       |
| <b><i>PLTP</i></b>   | rs7270170, rs1736493, rs553359, rs11086985, rs435306, rs441346, rs394643, rs2294212,<br>rs17447545, rs6065906, rs6032592                                                |
| <b><i>SREBF2</i></b> | rs5758487, rs1009544, rs2284082, rs2413660, rs2839713, rs133280, rs17002706, rs11702960,<br>rs4822063, rs1052717, rs17002737, rs2267443, rs4822066, rs713881, rs2269661 |

**Supplementary Table 2.** Sensitivity analyses taking familial clustering into account

| SNP        | HR   | 95% CI      | P-value |
|------------|------|-------------|---------|
| rs4970834  | 1.30 | 1.10 , 1.53 | 0.002   |
| rs9899634  | 0.79 | 0.68 , 0.93 | 0.003   |
| rs4149313  | 1.36 | 1.10 , 1.67 | 0.004   |
| rs602633   | 1.25 | 1.06 , 1.47 | 0.007   |
| rs838900   | 1.40 | 1.09 , 1.79 | 0.009   |
| rs3183702  | 0.81 | 0.69 , 0.94 | 0.007   |
| rs5090     | 1.40 | 1.08 , 1.81 | 0.011   |
| rs646776   | 1.23 | 1.04 , 1.44 | 0.013   |
| rs611917   | 1.20 | 1.04 , 1.39 | 0.011   |
| rs11172106 | 1.21 | 1.04 , 1.40 | 0.012   |

Associations between SNPs and MI in STR, adjusted for twin relatedness using Cox proportional hazards regression with age as time scale and study entry at age 18, adjusting sex and familial clustering. The effect allele was defined as the minor allele in our study. Results are reported as hazard ratios with 95% confidence intervals and P-values. Only SNPs at loci predominantly associated with MI in STR (Table 2) were reported.

Abbreviations: SNP, single nucleotide polymorphism; HR, hazard ratio; CI, confidence interval.

**Supplementary Table 3.** Sensitivity analyses using time at DNA collection as study entry after exclusion of individuals with any cardiovascular diseases before DNA collection

|            | <b>STR (n=2,436)</b> |            |         | <b>ULSAM (n=1,082)</b> |             |         |
|------------|----------------------|------------|---------|------------------------|-------------|---------|
| SNP        | HR                   | 95% CI     | P-value | HR                     | 95% CI      | P-value |
| rs4970834  | 1.08                 | 0.88, 1.33 | 0.449   | 0.88                   | 0.61 , 1.27 | 0.500   |
| rs9899634  | 0.88                 | 0.64, 1.09 | 0.191   | 1.02                   | 0.78 , 1.34 | 0.892   |
| rs4149313  | 1.11                 | 0.84, 1.47 | 0.457   | 1.56                   | 1.10 , 2.24 | 0.014   |
| rs602633   | 1.10                 | 0.90, 1.35 | 0.340   | 0.96                   | 0.71 , 1.29 | 0.782   |
| rs838900   | 1.56                 | 1.17, 2.08 | 0.002   | 1.11                   | 0.68 , 1.82 | 0.680   |
| rs3183702  | 0.90                 | 0.74, 1.08 | 0.269   | 1.04                   | 0.80 , 1.36 | 0.767   |
| rs5090     | 1.65                 | 1.22, 2.22 | 0.001   | NA                     | NA          | NA      |
| rs646776   | 1.09                 | 0.89, 1.34 | 0.387   | 1.00                   | 0.74 , 1.34 | 0.987   |
| rs611917   | 1.12                 | 0.94, 1.34 | 0.203   | 0.87                   | 0.66 , 1.15 | 0.325   |
| rs11172106 | 1.05                 | 0.88, 1.27 | 0.576   | 1.13                   | 0.88 , 1.45 | 0.343   |

Associations between SNPs and MI in STR using Cox proportional hazards regression with age as time scale, study entry at blood withdrawal as entry time, adjusting for sex. The effect allele was defined as the minor allele in our study. Results are reported as hazard ratios with 95% confidence intervals and P-values. Only SNPs at loci associated with MI in STR (table 2) are reported.

Abbreviations: SNP, single nucleotide polymorphism; HR, hazard ratio; CI, confidence interval.



**Supplementary Table 4.** Sex-specific results in STR

| SNP        | Male(n=1,124) |            |         | Female(n=1,478) |            |         |
|------------|---------------|------------|---------|-----------------|------------|---------|
|            | HR            | 95% CI     | P-value | HR              | 95% CI     | P-value |
| rs4970834  | 1.22          | 0.99, 1.50 | 0.068   | 1.41            | 1.12, 1.79 | 0.004   |
| rs9899634  | 0.71          | 0.58, 0.87 | 0.001   | 0.92            | 0.73, 1.17 | 0.509   |
| rs4149313  | 1.40          | 1.07, 1.84 | 0.014   | 1.28            | 0.92, 1.77 | 0.137   |
| rs602633   | 1.20          | 0.97, 1.48 | 0.090   | 1.34            | 1.05, 1.69 | 0.017   |
| rs838900   | 1.40          | 1.03, 1.90 | 0.031   | 1.39            | 0.94, 2.06 | 0.097   |
| rs3183702  | 0.72          | 0.58, 0.88 | 0.002   | 0.95            | 0.75, 1.20 | 0.638   |
| rs5090     | 1.42          | 1.03, 1.95 | 0.033   | 1.38            | 0.91, 2.09 | 0.126   |
| rs646776   | 1.17          | 0.95, 1.43 | 0.141   | 1.32            | 1.04, 1.67 | 0.021   |
| rs611917   | 1.15          | 0.95, 1.38 | 0.149   | 1.29            | 1.04, 1.60 | 0.020   |
| rs11172106 | 1.13          | 0.94, 1.37 | 0.194   | 1.32            | 1.05, 1.65 | 0.016   |

Associations between SNPs with MI in STR stratified by sex using Cox proportional hazards regression with age as time scale and study entry at age 18. The effect allele was defined as the minor allele in our study. Results are reported as hazard ratio with 95% confidence intervals and P-values. Only SNPs at loci predominantly associated with MI in STR (table 2) are reported here.

Abbreviations: SNP, single nucleotide polymorphism; HR, hazard ratio; CI, confidence interval.

**Supplementary Table 5.** Associations with lipids in STR and ULSAM

| SNP       | Alleles<br>(effect/other) | TRAITS          | STR  |        |                 |                       | ULSAM |        |                |         |
|-----------|---------------------------|-----------------|------|--------|-----------------|-----------------------|-------|--------|----------------|---------|
|           |                           |                 | N    | Beta   | 95% CI          | P-value               | N     | Beta   | 95% CI         | P-value |
| rs4970834 | A/G                       | TC              | 2447 | -0.170 | -0.256 , -0.084 | 1.122e <sup>-04</sup> | 883   | -0.062 | -0.186 , 0.062 | 0.326   |
|           |                           | HDL             | 2046 | -0.021 | -0.050 , 0.008  | 0.161                 | 881   | 0.012  | -0.031 , 0.056 | 0.575   |
|           |                           | LDL             | 1609 | -0.154 | -0.244 , -0.065 | 0.001                 | 878   | -0.057 | -0.168 , 0.054 | 0.313   |
|           |                           | TG <sup>a</sup> | 2029 | 0.004  | -0.031 , 0.039  | 0.826                 | 883   | -0.011 | -0.070 , 0.048 | 0.707   |
|           |                           | APOA1           | 1054 | -0.002 | -0.030 , 0.025  | 0.860                 | 385   | 0.05   | 0.003 , 0.097  | 0.038   |
|           |                           | APOB            | 1054 | -0.048 | -0.082 , -0.014 | 0.005                 | 385   | -0.019 | -0.063 , 0.024 | 0.390   |
| rs9899634 | T/A                       | TC              | 2449 | 0.024  | -0.054 , 0.102  | 0.543                 | 911   | 0.006  | -0.089 , 0.102 | 0.901   |
|           |                           | HDL             | 2056 | -0.012 | -0.038 , 0.015  | 0.390                 | 909   | 0.023  | -0.011 , 0.058 | 0.185   |
|           |                           | LDL             | 1617 | -0.010 | -0.090 , 0.071  | 0.810                 | 906   | -0.003 | -0.089 , 0.082 | 0.938   |
|           |                           | TG <sup>a</sup> | 2030 | 0.000  | -0.032 , 0.032  | 0.985                 | 911   | -0.022 | -0.068 , 0.023 | 0.337   |
|           |                           | APOA1           | 1055 | -0.011 | -0.036 , 0.014  | 0.393                 | 379   | 0.017  | -0.018 , 0.052 | 0.342   |
|           |                           | APOB            | 1055 | -0.006 | -0.037 , 0.026  | 0.716                 | 379   | -0.015 | -0.047 , 0.018 | 0.377   |
| rs4149313 | G/A                       | TC              | 2500 | 0.010  | -0.108 , 0.127  | 0.872                 | 963   | 0.045  | -0.093 , 0.182 | 0.524   |
|           |                           | HDL             | 2095 | 0.032  | -0.007 , 0.071  | 0.112                 | 961   | -0.025 | -0.074 , 0.024 | 0.321   |
|           |                           | LDL             | 1652 | 0.010  | -0.109 , 0.128  | 0.875                 | 958   | 0.053  | -0.069 , 0.175 | 0.396   |
|           |                           | TG <sup>a</sup> | 2077 | -0.007 | -0.054 , 0.041  | 0.788                 | 963   | 0.038  | -0.027 , 0.104 | 0.248   |
|           |                           | APOA1           | 1094 | 0.019  | -0.018 , 0.055  | 0.313                 | 424   | -0.040 | -0.094 , 0.015 | 0.155   |
|           |                           | APOB            | 1094 | -0.011 | -0.057 , 0.034  | 0.627                 | 424   | 0.026  | -0.025 , 0.076 | 0.320   |
| rs602633  | A/C                       | TC              | 2394 | -0.174 | -0.259 , -0.090 | 5.470e <sup>-05</sup> | 962   | -0.028 | -0.128 , 0.073 | 0.588   |
|           |                           | HDL             | 2021 | -0.012 | -0.041 , 0.016  | 0.403                 | 960   | 0.024  | -0.012 , 0.060 | 0.190   |

|           |     |                 |      |        |                 |                       |     |        |                |       |
|-----------|-----|-----------------|------|--------|-----------------|-----------------------|-----|--------|----------------|-------|
|           |     | LDL             | 1593 | -0.147 | -0.233 , -0.062 | 0.001                 | 957 | -0.048 | -0.138 , 0.041 | 0.291 |
|           |     | TG <sup>a</sup> | 1986 | 0.000  | -0.035 , 0.035  | 0.999                 | 962 | 0.007  | -0.041 , 0.055 | 0.770 |
|           |     | APOA1           | 1013 | -0.002 | -0.029 , 0.025  | 0.884                 | 424 | 0.060  | 0.022 , 0.098  | 0.002 |
|           |     | APOB            | 1013 | -0.051 | -0.085 , -0.017 | 0.003                 | 424 | -0.002 | -0.037 , 0.034 | 0.918 |
| rs838900  | G/A | TC              | 2498 | 0.196  | 0.055 , 0.337   | 0.006                 | 956 | 0.097  | -0.075 , 0.269 | 0.267 |
|           |     | HDL             | 2094 | 0.007  | -0.040 , 0.055  | 0.759                 | 954 | 0.005  | -0.057 , 0.066 | 0.881 |
|           |     | LDL             | 1651 | 0.098  | -0.048 , 0.244  | 0.190                 | 951 | 0.034  | -0.119 , 0.188 | 0.663 |
|           |     | TG <sup>a</sup> | 2075 | 0.009  | -0.048 , 0.067  | 0.753                 | 956 | 0.082  | 0.001 , 0.164  | 0.049 |
|           |     | APOA1           | 1093 | 0.017  | -0.026 , 0.061  | 0.440                 | 421 | -0.015 | -0.073 , 0.043 | 0.608 |
|           |     | APOB            | 1093 | 0.039  | -0.016 , 0.093  | 0.163                 | 421 | 0.058  | 0.005 , 0.111  | 0.034 |
| rs3183702 | A/G | TC              | 2425 | 0.036  | -0.042 , 0.114  | 0.367                 | 878 | -0.005 | -0.101 , 0.091 | 0.913 |
|           |     | HDL             | 2027 | -0.015 | -0.041 , 0.012  | 0.270                 | 877 | 0.023  | -0.011 , 0.058 | 0.191 |
|           |     | LDL             | 1593 | 0.002  | -0.079 , 0.083  | 0.956                 | 874 | -0.008 | -0.093 , 0.078 | 0.861 |
|           |     | TG <sup>a</sup> | 2010 | 0.001  | -0.032 , 0.033  | 0.968                 | 878 | -0.031 | -0.077 , 0.015 | 0.191 |
|           |     | APOA1           | 1037 | -0.017 | -0.042 , 0.009  | 0.192                 | 404 | 0.002  | -0.032 , 0.036 | 0.903 |
|           |     | APOB            | 1037 | 0.000  | -0.031 , 0.032  | 0.982                 | 404 | -0.026 | -0.057 , 0.005 | 0.104 |
| rs5090    | C/G | TC              | 2500 | -0.005 | -0.157 , 0.146  | 0.944                 | NA  | NA     | NA             | NA    |
|           |     | HDL             | 2095 | -0.021 | -0.072 , 0.029  | 0.413                 | NA  | NA     | NA             | NA    |
|           |     | LDL             | 1652 | 0.060  | -0.094 , 0.213  | 0.445                 | NA  | NA     | NA             | NA    |
|           |     | TG <sup>a</sup> | 2077 | -0.003 | -0.065 , 0.059  | 0.926                 | NA  | NA     | NA             | NA    |
|           |     | APOA1           | 1094 | -0.024 | -0.074 , 0.027  | 0.360                 | NA  | NA     | NA             | NA    |
|           |     | APOB            | 1094 | 0.007  | -0.056 , 0.070  | 0.828                 | NA  | NA     | NA             | NA    |
| rs646776  | G/A | TC              | 2493 | -0.185 | -0.268 , -0.101 | 1.510e <sup>-05</sup> | 958 | -0.024 | -0.126 , 0.078 | 0.642 |
|           |     | HDL             | 2089 | -0.014 | -0.042 , 0.014  | 0.319                 | 956 | 0.022  | -0.014 , 0.058 | 0.240 |
|           |     | LDL             | 1647 | -0.170 | -0.256 , -0.084 | 1.164e <sup>-04</sup> | 953 | -0.052 | -0.143 , 0.039 | 0.267 |

|            |     |                 |      |        |                 |       |     |                       |                |       |
|------------|-----|-----------------|------|--------|-----------------|-------|-----|-----------------------|----------------|-------|
|            |     | TG <sup>a</sup> | 2071 | 0.007  | -0.028 , 0.041  | 0.701 | 958 | 0.019                 | -0.030 , 0.067 | 0.452 |
|            |     | APOA1           | 1091 | 0.000  | -0.027 , 0.027  | 0.989 | 421 | 0.058                 | 0.020 , 0.097  | 0.003 |
|            |     | APOB            | 1091 | -0.045 | -0.079 , -0.011 | 0.009 | 421 | -0.002                | -0.038 , 0.034 | 0.928 |
| rs611917   | G/A | TC              | 2488 | -0.110 | -0.184 , -0.036 | 0.004 | 962 | -0.058                | -0.151 , 0.035 | 0.221 |
|            |     | HDL             | 2084 | -0.004 | -0.029 , 0.021  | 0.759 | 960 | 0.022                 | -0.011 , 0.055 | 0.198 |
|            |     | LDL             | 1642 | -0.070 | -0.145 , 0.006  | 0.071 | 957 | -0.081                | -0.164 , 0.002 | 0.055 |
|            |     | TG <sup>a</sup> | 2066 | -0.010 | -0.040 , 0.021  | 0.538 | 962 | 4.247e <sup>-04</sup> | -0.044 , 0.045 | 0.985 |
|            |     | APOA1           | 1090 | -0.001 | -0.025 , 0.023  | 0.909 | 423 | 0.045                 | 0.011 , 0.079  | 0.009 |
|            |     | APOB            | 1090 | -0.032 | -0.062 , -0.002 | 0.036 | 423 | -0.009                | -0.041 , 0.022 | 0.571 |
| rs11172106 | G/C | TC              | 2497 | 0.020  | -0.053 , 0.094  | 0.588 | 971 | -0.064                | -0.151 , 0.023 | 0.153 |
|            |     | HDL             | 2092 | -0.006 | -0.030 , 0.018  | 0.629 | 969 | 0.012                 | -0.019 , 0.044 | 0.446 |
|            |     | LDL             | 1649 | -0.026 | -0.100 , 0.049  | 0.497 | 966 | -0.061                | -0.139 , 0.017 | 0.127 |
|            |     | TG <sup>a</sup> | 2074 | -0.011 | -0.041 , 0.019  | 0.475 | 971 | -0.035                | -0.077 , 0.006 | 0.096 |
|            |     | APOA1           | 1094 | -0.005 | -0.029 , 0.019  | 0.676 | 428 | -0.009                | -0.040 , 0.023 | 0.59  |
|            |     | APOB            | 1094 | 0.002  | -0.028 , 0.032  | 0.899 | 428 | -0.02                 | -0.049 , 0.009 | 0.184 |

Associations between SNPs at loci associated with MI with serum lipids levels including TC, HDL, LDL, TG, APOA1 and APOB. Data are effect sizes (beta) with 95% confidence intervals and P-values from linear regressions assuming additive genetic models. Left panel shows results from STR analyzed with multilevel mixed-effects linear regression models adjusted by age, sex and fasting status. Right panel includes results from ULSAM analyzed with linear regression adjusted by age. The effect allele was defined as the minor allele in our study. Fasting here refers fasting overnight before taking blood tests for circulating lipids levels.

<sup>a</sup>We used natural log TG for TG trait.

Abbreviations: SNP, single nucleotide polymorphism; CI, confidence interval; TC, total cholesterol; HDL, high-density lipoprotein cholesterol; LDL, low-density lipoprotein cholesterol; TG, triglycerides; APOA1, apolipoprotein AI; APOB, apolipoprotein B.

## Full author list and affiliation for CARDIoGRAMplusC4D consortium

Panos Deloukas<sup>1</sup>, Stavroula Kanoni<sup>1</sup>, Christina Willenborg<sup>2-3</sup>, Martin Farrall<sup>4-5</sup>, Themistocles L Assimes<sup>6</sup>, John R Thompson<sup>7</sup>, Erik Ingelsson<sup>8</sup>, Danish Saleheen<sup>9-11</sup>, Jeanette Erdmann<sup>2-3</sup>, Muredach P Reilly<sup>12</sup>, Rory Collins<sup>13</sup>, Sekar Kathiresan<sup>14-15</sup>, Anders Hamsten<sup>16-17</sup>, Unnur Thorsteinsdottir<sup>18-19</sup>, Jaspal S Kooner<sup>20</sup>, John Danesh<sup>10</sup>, Colin Neil Alexander Palmer<sup>21</sup>, Robert Roberts<sup>22</sup>, Hugh Watkins<sup>4-5</sup>, Heribert Schunkert<sup>2-3</sup>, Nilesh J Samani<sup>23-24</sup>, Stefan Blankenberg<sup>25</sup>, Bernhard O Boehm<sup>26</sup>, John C Chambers<sup>27</sup>, Robert Clarke<sup>13</sup>, George Dedoussis<sup>28</sup>, Paul W Franks<sup>29-30</sup>, Christian Hengstenberg<sup>31</sup>, GKeesHovingh<sup>32</sup>, Jong-Young Lee<sup>33</sup>, Terho Lehtimäki<sup>34-35</sup>, Winfried März<sup>36-37</sup>, Andres Metspalu<sup>38-39</sup>, Markku S Nieminen<sup>40</sup>, Christopher O'Donnell<sup>41</sup>, Markus Perola<sup>42</sup>, Samuli Ripatti<sup>1, 22</sup>, Manjinder S Sandhu<sup>1, 43</sup>, Stefan Schreiber<sup>44</sup>, Agneta Siegbahn<sup>45</sup>, Cristen J Willer<sup>46</sup>, Pierre A Zalloua<sup>47</sup>, Benjamin A Goldstein<sup>6</sup>, Kathleen Stirrups<sup>1</sup>, Inke R König<sup>48</sup>, Jean-Baptiste Cazier<sup>4</sup>, Åsa Johansson<sup>45</sup>, Tõnu Esko<sup>38-39</sup>, Lasse Folkersen<sup>16-17</sup>, Anuj Goel<sup>4-5</sup>, Aki S Havulinna<sup>42</sup>, Weang K Ho<sup>10</sup>, Jemma C Hopewell<sup>13</sup>, Niclas Eriksson<sup>45</sup>, Marcus E Kleber<sup>37, 49</sup>, Kati Kristiansson<sup>42</sup>, Per Lundmark<sup>50</sup>, Leo-Pekka Lyytikäinen<sup>34-35</sup>, Suzanne Rafelt<sup>23</sup>, Dmitry Shungin<sup>29</sup>, Rona J Strawbridge<sup>16-17</sup>, Gudmar Thorleifsson<sup>18</sup>, Emmi Tikkanen<sup>22</sup>, Natalie Van Zuydam<sup>21</sup>, Benjamin F Voight<sup>51</sup>, Lindsay L Waite<sup>52</sup>, Weihua Zhang<sup>27</sup>, Andreas Ziegler<sup>48</sup>, Devin Absher<sup>52</sup>, Ines Barroso<sup>1, 53</sup>, Christof Burdorf<sup>2-3</sup>, Simone Claudi-Boehm<sup>54</sup>, DIAGRAM consortium, NourEddine El Mokhtari<sup>55</sup>, Krista Fischer<sup>38</sup>, Pierre Fontanillas<sup>15</sup>, Bruna Gigante<sup>56</sup>, Leif Groop<sup>57</sup>, Stefan Gustafsson<sup>8</sup>, Jörg Hager<sup>58</sup>, Bok-Ghee Han<sup>33</sup>, Sarah E Hunt<sup>1</sup>, Thorsten Kessler<sup>2, 3</sup>, Joshua W Knowles<sup>6</sup>, Claudia Langenberg<sup>43</sup>, Cordelia Langford<sup>1</sup>, Mark I McCarthy<sup>4, 59-60</sup>, Martina Müller-Nurasyid<sup>61-63</sup>, Kjell Nikus<sup>64</sup>, John F Peden<sup>4</sup>, Silke Rosinger<sup>26</sup>, Diana Rubin<sup>65</sup>, Moritz P Rumpf<sup>2-3</sup>, Arne Schäfer<sup>44</sup>, Alexandre FR Stewart<sup>22</sup>, Peter J Wagner<sup>66</sup>, Wellcome Trust Case Control Consortium; Hyun M Kang<sup>67</sup>, N William Rayner<sup>4</sup>, Elin Grundberg<sup>1, 68</sup>, Per Eriksson<sup>16-17</sup>, Anders Franco-Cereceda<sup>69</sup>, Anders Lundmark<sup>50</sup>, Olle Melander<sup>57</sup>, Seraya Maouche<sup>70</sup>, MuTHER, Tsun-Po Yang<sup>1</sup>, Alison H Goodall<sup>23</sup>, Eric Schadt<sup>71</sup>, Tomi Pastinen<sup>72</sup>, Ann-Christine Syvänen<sup>50</sup>, Alan S Go<sup>73</sup>, Mark A Hlatky<sup>6</sup>, Thomas Quertermous<sup>6</sup>, Ellen C van der Schoot<sup>74</sup>, Hanneke Basart<sup>32</sup>, Patrick Diemert<sup>25</sup>, Philipp S Wild<sup>73</sup>, CARDIOGENICS, Francois Cambien<sup>70</sup>, Willem H Ouwehand<sup>1, 76-78</sup>, Eric Boerwinkle<sup>78</sup>, Adrienne L Cupples<sup>79</sup>, Abbas Dehghan<sup>80</sup>, Vilmundur Gudnason<sup>19, 81</sup>, Marja-Liisa Lokki<sup>82</sup>, Juha Sinisalo<sup>40</sup>, Gudmundur Thorgeirsson<sup>19, 83</sup>, Hilma Holm<sup>18</sup>, Kari Stefansson<sup>18, 83</sup>, Nicholas Wareham<sup>43</sup>, Evelin Mihailov<sup>39</sup>, Dominique Gauguier<sup>4, 84</sup>, Mika Kähönen<sup>85</sup>, Veikko Salomaa<sup>42</sup>, Lars Wallentin<sup>45</sup>, Thomas Illig<sup>86</sup>, Christa Meisinger<sup>87</sup>, Klaus Stark<sup>31</sup>, Martina E Zimmermann<sup>31</sup>, Göran Hallmans<sup>88</sup>, Alex SF Doney<sup>21</sup>, Andrew D Morris<sup>21</sup>, Sarah Parish<sup>13</sup>, Yangsoo Jang<sup>89</sup>, Hyo-Soo Kim<sup>90</sup>, Ji-Young Lee<sup>33</sup>, Jeong E Park<sup>91</sup>, Sian-Tsung Tan<sup>20</sup>, Reijo Laaksonen<sup>92</sup>, Johanna Kuusisto<sup>93</sup>, Michael Boehnke<sup>67</sup>, Markku Laakso<sup>93</sup>, Ron Do<sup>15, 94</sup>, Kari Kuulasmaa<sup>42</sup>, Jarmo Virtamo<sup>42</sup>, Philippe Amouye<sup>195</sup>, Dominique Arveiler<sup>96</sup>, Jean Ferrières<sup>97</sup>, David-Alexandre Trégouët<sup>70</sup>, Norman Klopp<sup>86</sup>, Annette Peters<sup>87, 98</sup>, Paolo Brambilla<sup>99</sup>, Marco M Ferrario<sup>100</sup>, Alun Evans<sup>101</sup>, Frank Kee<sup>102</sup>, George A Wells<sup>22</sup>, Stanley L Hazen<sup>103</sup>, Svati Shah<sup>104</sup>, Stephen Epstein<sup>105</sup>, Daniel J Rader<sup>106</sup>, David Altshuler<sup>15, 107-108</sup>, David Cox<sup>109</sup>, Ci Song<sup>8</sup>, Lars Lind<sup>50</sup>, Nancy L Pedersen<sup>8</sup>, Asif Rasheed<sup>9</sup>, Karin Leander<sup>56</sup>, Ulf de Faire<sup>56</sup>, Maria Dimitriou<sup>28</sup>, Genovefa Kolovou<sup>110</sup>, Ulm (EMIL) Wolfgang Koenig<sup>111</sup>, Wolfgang Kratzer<sup>111</sup>, Anthony JBalmforth<sup>112</sup>, Peter S Braund<sup>23-24</sup>, Mohan Sivananthan<sup>113</sup>, Alistair S Hall<sup>114</sup>

1Wellcome Trust Sanger Institute, Hinxton UK; 2Universität zu Lübeck, Medizinische Klinik II, Ratzeburger Allee 160, 23538 Lübeck, Germany; 3 Deutsches Zentrum für Herz-Kreislauf-Forschung (DZHK), 23538 Lübeck, Germany; 4Wellcome Trust Centre for Human Genetics, University of Oxford, UK; 5Cardiovascular Medicine, University of Oxford, Oxford UK; 6 Department of Medicine, Stanford University School of Medicine; 7Department of Health Sciences, University of Leicester, Leicester UK; 8 Department of Medical Epidemiology and Biostatistics, Karolinska Institute, Stockholm, Sweden; 9Center for Non-Communicable Diseases, Karachi, Pakistan; 10Department of Public Health and Primary Care, University of Cambridge, UK; 11Department of Medicine, University of Pennsylvania, USA; 12 Cardiovascular Institute, Perelman School of Medicine at the University of Pennsylvania, Philadelphia, PA 19130, USA; 13Clinical Trial Service Unit and Epidemiological Studies Unit, University of Oxford, Oxford, UK; 14 Cardiology Division, Center for Human Genetic Research, and Cardiovascular Research Center, Massachusetts General Hospital and Harvard Medical School, Boston, USA; 15Broad Institute of Harvard/MIT, Cambridge, USA; 16 Atherosclerosis Res Unit, Department of Medicine, Karolinska Institutet; 17Center for Molecular Medicine, Karolinska University Hospital, Stockholm, Sweden; 18 deCODE genetics, Sturlugata 8, Reykjavik, Iceland; 19University of Iceland, Faculty of Medicine, Reykjavik, Iceland; 20 National Heart and Lung Institute (NHLI), Imperial College London, Hammersmith Hospital, London, UK; 21Medical Research Institute, University of Dundee, Ninewells Hospital and Medical School, Dundee, DD1 9SY UK; 22 Institute for Molecular Medicine FIMM, University of Helsinki and Public Health Genomics Unit, National Institute for Health and Welfare, Helsinki, Finland; 23 Department of Cardiovascular Sciences, University of Leicester, Glenfield Hospital, Leicester, LE19 9QP, UK; 24National Institute for Health Research Leicester Cardiovascular Biomedical Research Unit, Glenfield Hospital, Leicester LE3 9QP, UK; 25University Heart Center Hamburg, Clinic for general and interventional Cardiology, Hamburg, Germany; 26Division of Endocrinology and Diabetes, Department of Internal Medicine, Ulm University Medical Centre, Ulm, Germany; 27Epidemiology and Biostatistics, Imperial College London, London, UK; 28Department of Dietetics-Nutrition, Harokopio University, 70 El. Venizelou Str, Athens, Greece; 29Department of Clinical Sciences, Genetic & Molecular Epidemiology Unit, Lund University Diabetes Center, Skåne University Hospital, Malmö, Sweden & Department of Public Health & Clinical Medicine, Genetic Epidemiology & Clinical Research Group, Section for Medicine & Department of Odontology, Umeå University, Umeå, Sweden; 30Department of Nutrition, Harvard School of Public Health, Boston, MA USA; 31Klinik und Poliklinik für Innere Medizin II, Regensburg, Germany; 32Dept Vascular Medicine, Academic Medical Center, Amsterdam, The Netherlands; 33 Center for Genome Science, Korea National Institute of Health, KCDC, Chungcheongbuk-do 363-951, Korea; 34Department of Clinical Chemistry, Fimlab Laboratories, Tampere University Hospital, Tampere 33101, Finland; 35Department of Clinical Chemistry, University of Tampere School of Medicine, Tampere 33521, Finland ; 36Synlab Academy, Gottlieb-Daimler-Straße 25, 68165 Mannheim, Germany; 37Mannheim Institute of Public Health, Social and Preventive Medicine, Medical Faculty of Mannheim, University of Heidelberg, Ludolf-Krehl-Strasse 7-11, 68167 Mannheim,

Germany; 38Estonian Genome Center, University of Tartu, Tartu, Estonia; 39Insitute of Molecular and Cell Biology, University of Tartu, Tartu, Estonia; 40Division of Cardiology, Department of Medicine, Helsinki University Central Hospital (HUCH), Helsinki, Finland; 41Framingham Heart Study, National Heart, Lung and Blood Institute, Framingham, MA 01702, US; 42Department of Chronic Disease Prevention, National Institute for Health and Welfare, Helsinki FIN-00271, Finland; 43MRC Epidemiology Unit, Institute of Metabolic Science, Addenbrooke's Hospital, Box 285, Cambridge, CB2 0QQ, UK; 44Institut für Klinische Molekularbiologie, Christian-Albrechts Universität, Kiel, Germany; 45Uppsala Clinical Research Center, Uppsala University, Uppsala, Sweden; 46Department of Internal Medicine , Division of Cardiovascular Medicine, and Department of Human Genetics, University of Michigan, Ann Arbor, Michigan, USA; 47Lebanese American University, Chouran Beirut, Lebanon; 48Institut für Medizinische Biometrie und Statistik, Universität zu Lübeck, Lübeck, Germany; 49LURIC Study nonprofit LLC, Platz der alten Synagoge 1, 79098 Freiburg, Germany; 50 Department of Medical Sciences, Uppsala University, Uppsala, Sweden; 51Department of Pharmacology, University of Pennsylvania, Philadelphia, USA; 52HudsonAlpha Institute for Biotechnology, Huntsville, AL, USA; 53 University of Cambridge, Metabolic Research Laboratories, Institute of Metabolic Science, Addenbrooke's Hospital, Cambridge, UK; 54Practice of Gynecology, Ulm University Medical Centre, Ulm, Germany; 55Klinik für Innere Medizin, Kreiskrankenhaus Rendsburg, Rendsburg, Germany; 56Division of Cardiovascular Epidemiology, Institute of Environmental Medicine, Karolinska Institutet, Stockholm, Sweden; 57Department of Clinical Sciences, Diabetes and Endocrinology, Lund University, University Hospital Malmö, Malmö, Sweden.; 58CEA-Genomics Institute, National Genotyping Centre, Paris, France; 59Oxford Centre for Diabetes, Endocrinology and Metabolism, University of Oxford, OX3 7LJ UK; 60Oxford National Institute for Health Research Biomedical Research Centre, Churchill Hospital, Old Road Headington, Oxford, OX3 7LJ, UK; 61Department of Medicine I, University Hospital Grosshadern, Ludwig-Maximilians-Universität, Munich, Germany; 62 Institute of Medical Informatics, Biometry and Epidemiology, Chair of Epidemiology and Chair of Genetic Epidemiology, Ludwig-Maximilians-Universität, Munich, Germany; 63 Institute of Genetic Epidemiology, Helmholtz Zentrum München - German Research Center for Environmental Health, Neuherberg, Germany; 64 Heart Centre, Department of Cardiology, Tampere University Hospital, Tampere 33521, Finland; 65MedizinischeKlinik I, Universitätsklinikum Schleswig-Holstein, Campus Kiel, Kiel, Germany; 66 Institute for Molecular Medicine FIMM, University of Helsinki and Public Health Genomics Unit, National Institute for Health and Welfare, Helsinki, Finland; 67 Department of Biostatistics, Center for Statistical Genetics, University of Michigan, Ann Arbor, Michigan 48109, USA; 68 Department of Twin Research and Genetic Epidemiology, King's College London, SE17EH London, United Kingdom; 69 Cardiothoracic Surgery Unit, Department of Molecular Medicine and Surgery, Karolinska Institutet; 70INSERM UMR\_S 937 & ICAN Institute for Cardiometabolism and Nutrition, Pierre and Marie Curie University, Paris 6, France; 71Institute for Genomics and Multiscale Biology, Department of Genetics and Genomic Sciences , Mount Sinai School of Medicine, US; 72Department of Human Genetics, McGill University, Montréal, Canada; 73 Division of Research, Kaiser Permanente Northern California; 74 Department of Experimental immunohematology, Sanquin, Amsterdam, The Netherlands; 75Medical



university Center Mainz, Dept. Of Medicine II, Mainz, Germany; 76Department of Haematology, University of Cambridge, CB2 0PT UK; 77NHS Blood and Transplant, Cambridge, CB2 0PT, UK; 78University of Texas Health Science Center, Human Genetics Center, Houston, Texas, USA; 79Department of Biostatistics, Boston University School of Public Health, Boston & National Heart, Lung, and Blood Institute's Framingham Heart Study, Framingham, Massachusetts, USA; 80Department of Epidemiology, Erasmus Medical Center, Rotterdam, The Netherlands ; 81Icelandic Heart Association, Kopavogur, Iceland; 82Transplantation Laboratory, Haartman Institute, University of Helsinki, Helsinki, Finland; 83 Department of Medicine, Landspítali University Hospital, Reykjavik, Iceland.; 84INSERM UMRS872, Cordeliers Research Centre, Paris, France; 85 Department of Clinical Physiology, Tampere University Hospital and University of Tampere, Tampere 33521, Finland; 86Unit for Molecular Epidemiology, Helmholtz Zentrum München - German Research Center for Environmental Health, Neuherberg, Germany; 87 Institute of Epidemiology II, Helmholtz Zentrum München - German Research Center for Environmental Health, Neuherberg, Germany; 88Department of Public Health & Clinical Medicine, Section for Nutritional Research, Umeå University, Umeå, Sweden; 89Cardiology Division, Department of Internal Medicine, Cardiovascular Genome Center, Yonsei University; 90Department of Internal Medicine, Cardiovascular Center, Seoul National University Hospital, Seoul , Korea; 91 Division of Cardiology, Samsung Medical Center, Seoul, Korea; 92 Science Center, Tampere University Hospital, Finland; 93Department of Medicine, University of Eastern Finland and Kuopio University Hospital, Kuopio, Finland; 94Center for Human Genetic Research, Massachusetts General Hospital and Harvard Medical, Boston, USA; 95Institut Pasteur de Lille, INSERM U744, Université Lille Nord de France, F-59000 Lille, France; 96Department of Epidemiology and Public Health, EA3430, University of Strasbourg, Strasbourg, France; 97Department of Cardiology, Toulouse University School of Medicine, Rangueil Hospital, Toulouse, France; 98Munich Heart Alliance, Munich, Germany; 99Department of Experimental Medicine, University of Milano-Bicocca, Monza, Italy; 100EPIMED Research Centre, Department of Clinical and Experimental Medicine, University of Insubria, Varese, Italy; 101Centre for Public Health, The Queen's University of Belfast, Belfast, Northern Ireland; 102UKCRC Centre of Excellence for Public Health (NI), Queens University of Belfast, Northern Ireland; 103 Lerner Research Institute, Cleveland Clinic, Cleveland, Ohio, USA; 104 Duke University; 105Cardiovascular Research Institute, Washington Hospital Center, 110 Irving St NW, Washington, DC 20010, USA; 106Division of Translational Medicine and Human Genetics, Department of Medicine, Perelman School of Medicine at the University of Pennsylvania, Philadelphia, PA 19130, USA; 107Department of Molecular Biology and Center for Human Genetic Research, Massachusetts General Hospital, Boston, USA; 108Department of Genetics, Harvard Medical School, Boston, USA; 109Biotherapeutics and Bioinnovation Center, Pfizer Inc, USA; 1101st Cardiology Department, Onassis Cardiac Surgery Center 356, Sygrou Ave, Athens, Greece; 111Department of Internal Medicine II - Cardiology, Ulm University Medical Center, Ulm, Germany; 112Division of Cardiovascular and Diabetes Research, Multidisciplinary Cardiovascular Research Centre, Leeds Institute of Genetics, Health and Therapeutics, University of Leeds, Leeds, UK; 113 Division of Epidemiology, MCRC & Leeds Institute of Genetics, Health and Therapeutics, University of Leeds, Leeds, UK; 114 Division of

Cardiovascular and Neuronal Remodelling, Multidisciplinary Cardiovascular Research Centre, Leeds Institute of Genetics, Health and Therapeutics, University of Leeds, UK
